# Supplementary material
Source: PubMed Central journal article supplement (PMC4767590)
Supplement: NIHMS745046-supplement-1.pdf [file NIHMS745046-supplement-1.pdf]

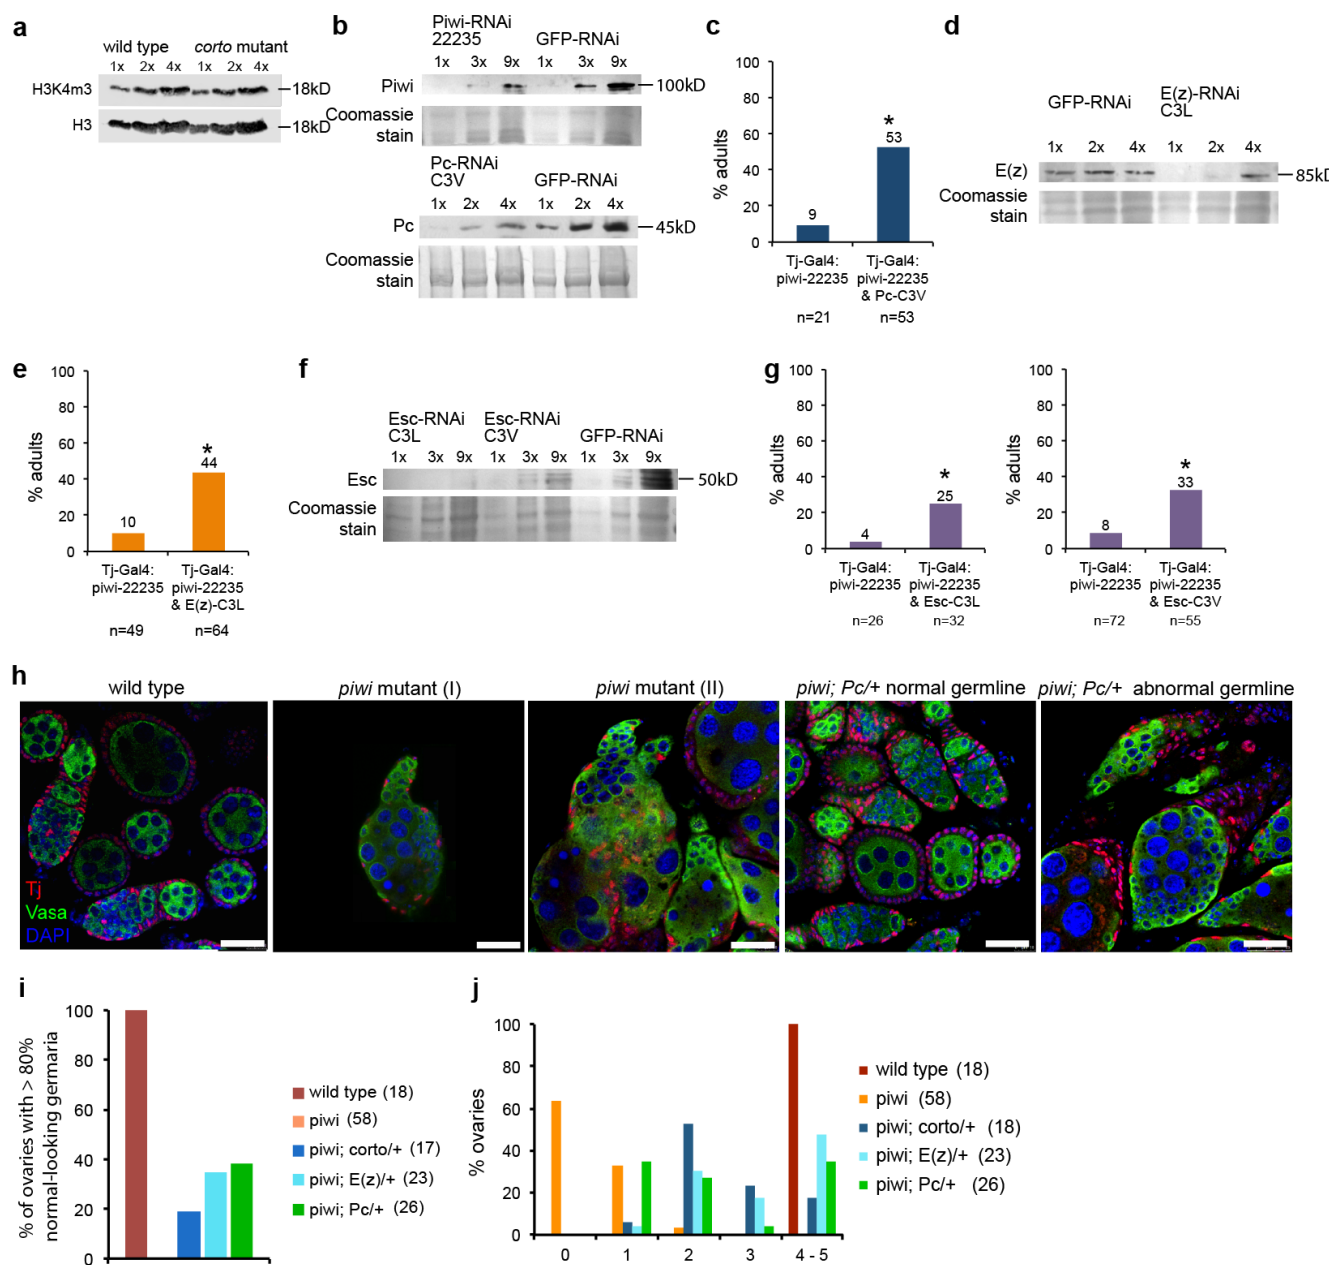

**Supplementary Fig. 1.** RNAi-induced reduction in *E(z)* or *Esc* or mutations in Polycomb Group genes or *corto* partially rescues oogenesis of *piwi* mutants.

(a) *In vitro* reconstituted PRC2 complexes (represented by *E(z)* immunoblotting) were incubated with or without recombinant Corto, and  $^3\text{H}$ -methylation signals were analyzed by radiography.

(b) Immunoblotting analysis shows that the RNAi hairpins reduce the target proteins Piwi and Pc. The genotype is: *actin:gal4*; *UAS:RNAi* hairpins of *GFP*, *piwi* (22235), or *Pc* (C3V).

(c) 9% of the *Tj:gal4*; *UAS:piwi*-RNAi females contain ovarioles, compared to 53% of the *Tj:gal4*, *UAS:piwi*-RNAi; *UAS:Pc*-RNAi females that contain ovarioles.

(d) Two-fold serial dilutions of whole-fly extract were analyzed by immunoblotting to *E(z)*. The animals were *actin:gal4*; *UAS:RNAi* hairpins of *GFP* or *E(z)* (C3L).

(e) 10% of the *Tj:gal4*; *UAS:piwi*-RNAi females contain ovarioles, compared to 44% of the *Tj:gal4*, *UAS:piwi*-RNAi; *UAS:E(z)*-RNAi females that contain ovarioles.

- (f) Three-fold serial dilutions of whole-animal extract were analyzed by immunoblotting to Esc. The animals were *actin:gal4; UAS:RNAi* hairpins of GFP or Esc (C3L or C3V).
- (g) 4 to 8% of the *Tj:gal4; UAS:piwi-RNAi* females contain ovarioles, compared to 25% (C3L) or 33% (C3V) of the *Tj:gal4; UAS:piwi-RNAi; UAS:Esc-RNAi* females that contain ovarioles.
- (h) Representative images of wild type, *piwi*, and *piwi; Pc/+* normal and abnormal germline tissues. The *piwi* mutant ovarian tissues exhibit two typical defects: no egg chambers (I) and disorganized tissues containing well-formed egg chambers (II). Tj (red, ovarian somatic cell marker) and Vasa (green, germline cell marker) immunofluorescence microscopy of whole-mount ovaries. Bar = 25  $\mu$ m.
- (i) The histogram shows percentages of ovaries containing >80% normal germaria. Sample sizes are in parentheses.
- (j) Percentages of ovaries that contain averaged egg chamber numbers per ovariole. Sample sizes are in parentheses.

For immunoblotting analyses, lower portions of the gels were Coomassie stained to show equal loading. For the genetic analyses, the sample sizes are indicated in each experimental group. Significant differences, as indicated by asterisks, are based on the p-value cutoff of  $p < 0.001$  (Chi-square test).

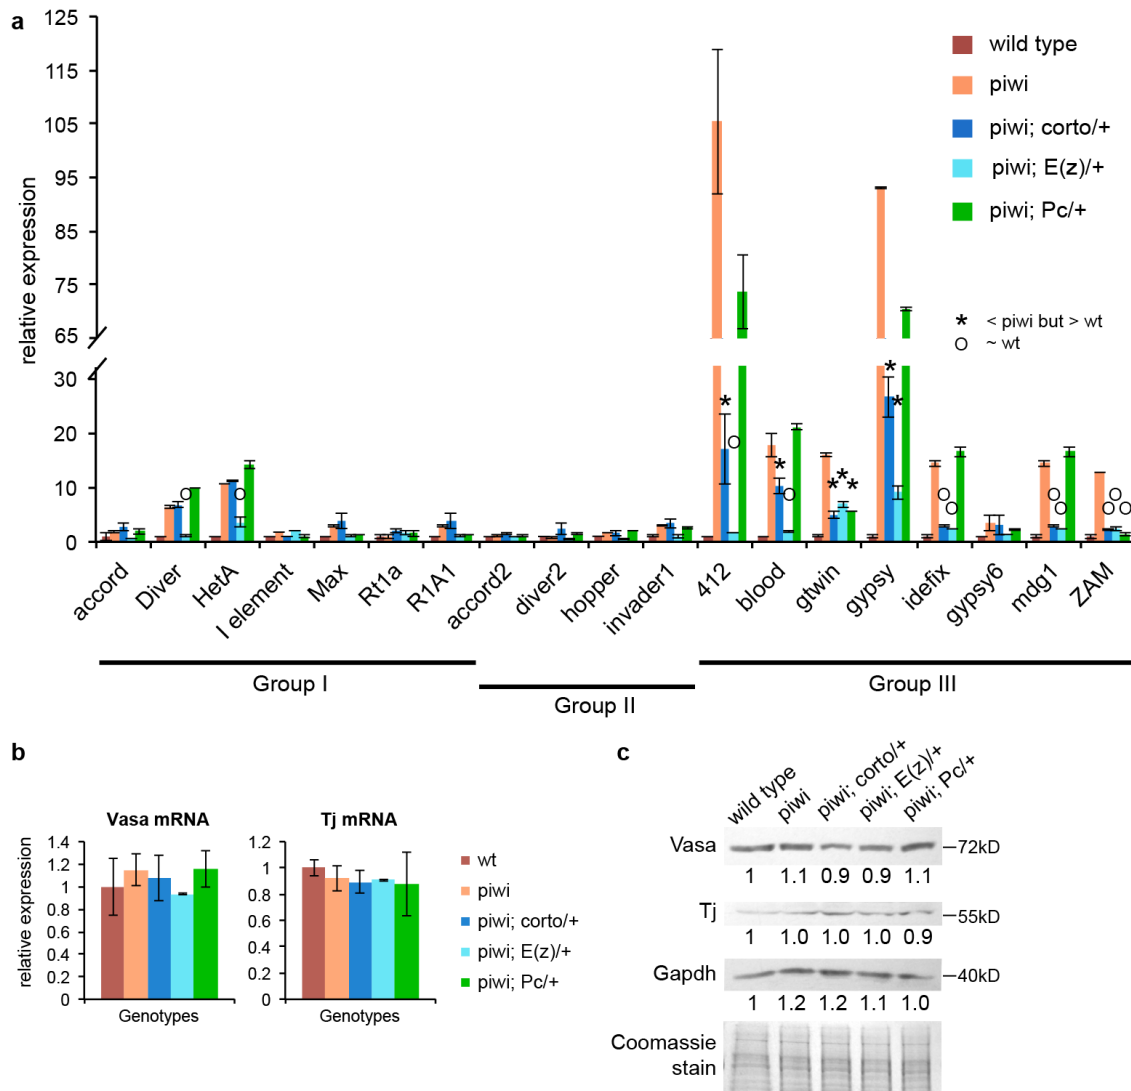

**Supplementary Fig. 2.** *Piwi*, *corto*, and Polycomb Group genes genetically interact to silence retrotransposons.

(a) RT-qPCR analysis of transposon mRNA levels in wild type, *piwi* mutants, and *piwi* with heterozygous *corto*, *E(z)*, or *Pc* mutation. The mRNA levels were normalized to *rp49* mRNA levels within each group. The heterozygous *corto* mutation suppresses transposons in Group III that are increased by the *piwi* mutations. The heterozygous *E(z)* mutation suppresses all transposons increased by the *piwi* mutations. The heterozygous *Pc* mutation suppresses *gtwin* and *ZAM* in Group III that are increased by the *piwi* mutations. The error bars represent standard deviations calculated from triplicate qPCR reactions. Asterisks (\*) indicate mRNA levels that are significantly lower ( $p < 0.001$ ) than those in the *piwi* mutant but significantly larger ( $p < 0.001$ ) than those in wild type. Circles (O) indicate mRNA levels that are significantly lower ( $p < 0.001$ ) than those in the *piwi* mutant and similar to those in wild type. P-values were calculated using one-sided Student's *t*-test with unequal variance.

The mRNAs (by RT-qPCR in b; normalization to *rp49*) and proteins (by immunoblotting in c) of Vasa (germ cell marker) and Tj (somatic cell marker) were quantitated and shown to be at similar levels in wild type, *piwi* mutants, and *piwi* with heterozygous *corto*, *E(z)*, or *Pc* mutation. Numbers underneath individual immunoblotting bands indicate relative protein levels (normalized to wild type).

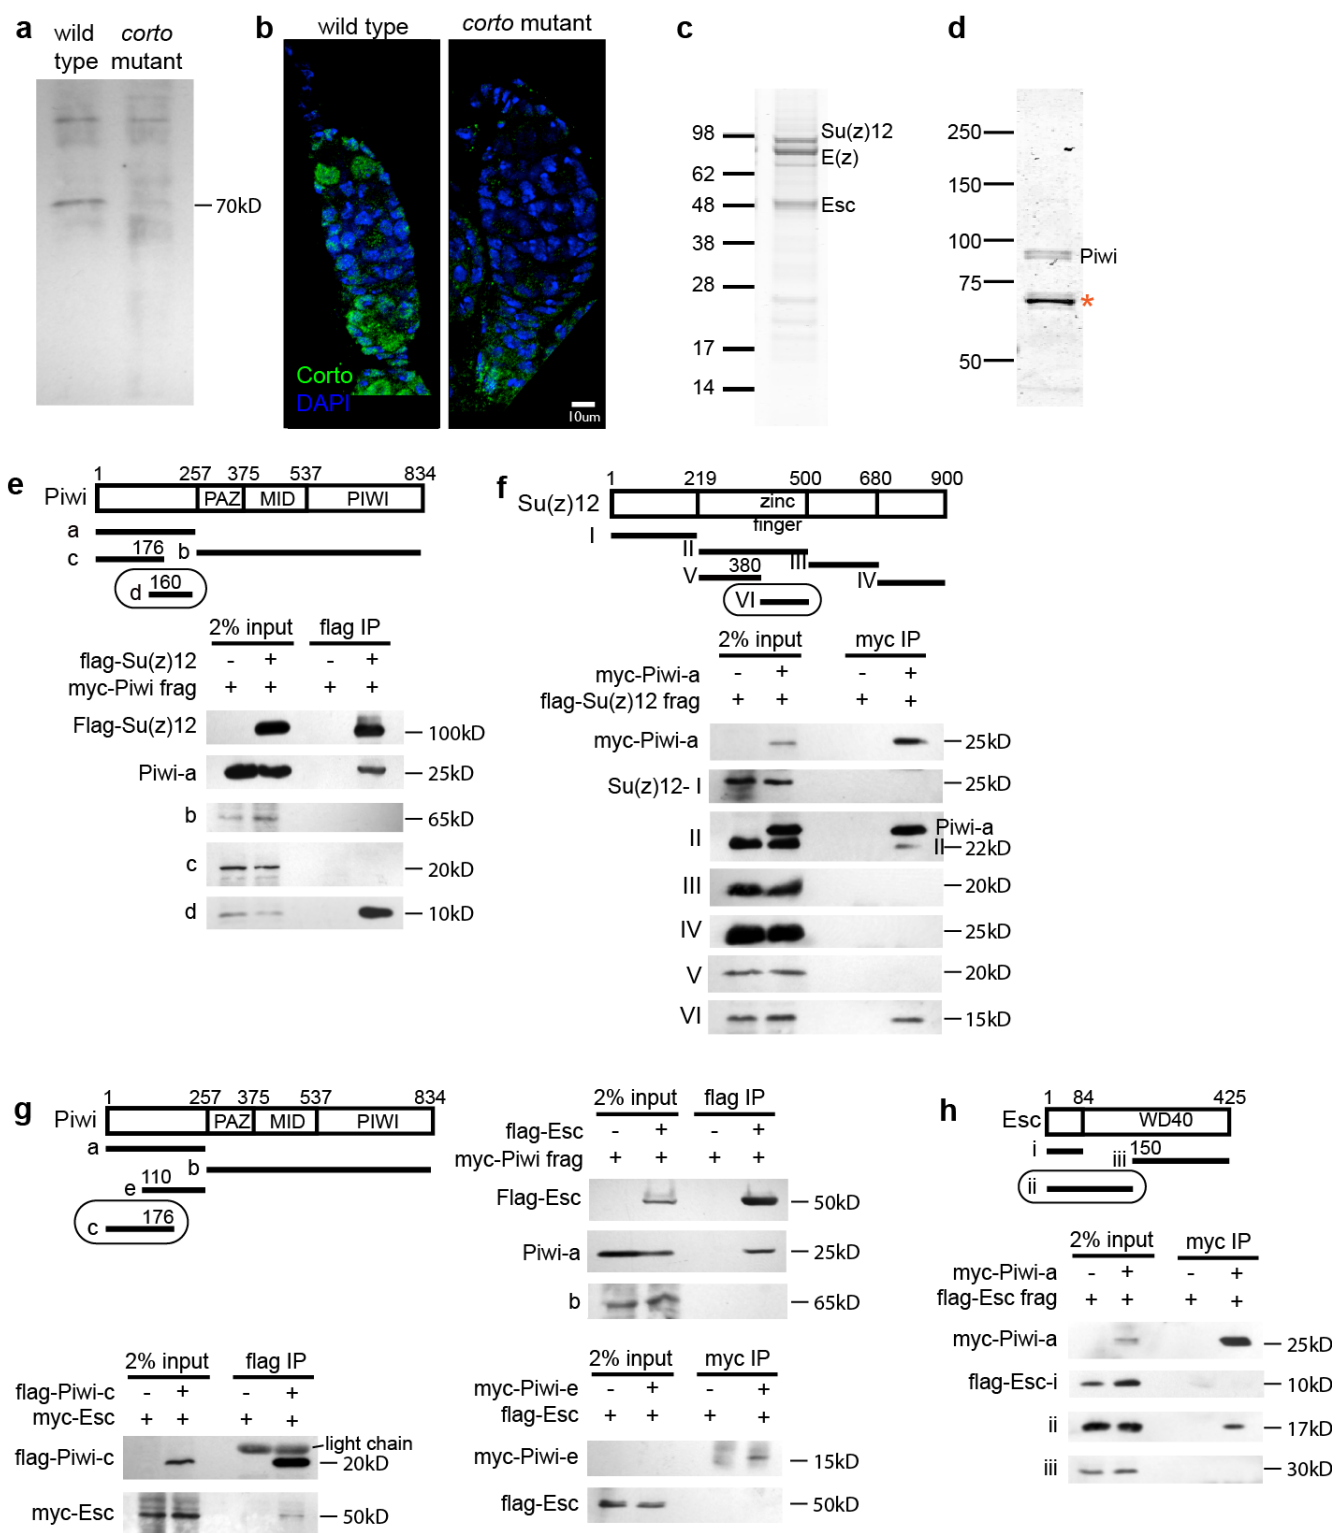

**Supplementary Fig. 3.** Specificity of the generated Corto antibody, gradient analyses and pull down results that identify interacting domains in Piwi, Su(z)12, and Esc.

(a) Immunoblotting analysis of wild type and the *corto* mutant animal extracts.

- (b) Immunofluorescence microscopy of wild type and *corto* mutant ovaries shows that Corto signals (green) are greatly reduced in the *corto* mutant.
- (c) Coomassie-stained gel to visualize *in vitro* reconstituted PRC2 complex. Gel bands of Su(z)12, E(z), and Esc are indicated.
- (d) Coomassie-stained gel to visualize purified recombinant Piwi-flag proteins. Asterisk (\*) indicates a protein that co-purified with Piwi.
- (e) Amino acid residues 160-257 (fragment d) of Piwi binds to Su(z)12. Full-length flag-Su(z)12 was used as a bait to pull myc-tagged Piwi fragments a, b, c, and d. Bound proteins were visualized by immunoblotting to myc.
- (f) Residues 380-500 (fragment VI) of Su(z)12 binds to Piwi. Myc-tagged fragment a (aa 1-257) of Piwi was used as a bait to pull flag-tagged Su(z)12 fragments I, II, III, IV, V and VI. Bound proteins were visualized by immunoblotting to flag. 'Piwi-a' and 'II' labels indicate protein bands in the immunoprecipitate lane.
- (g) Residues 1-176 (fragment c) of Piwi binds to Esc. Flag-tagged Esc was used as a bait to pull down Myc-tagged Piwi fragments a or b. Flag-tagged Piwi fragment c was used as a bait to pull down myc-tagged Esc. Myc-tagged Piwi fragment d was used as a bait to pull down flag-tagged Esc. Bound proteins were visualized by immunoblotting to flag or myc. 'light chain' label is placed next to the protein bands above flag-Piwi-C to indicate signals from the light chain of the antibody.
- (h) Residues 1-150 (fragment ii) of Esc binds to Piwi. Myc-tagged fragment a (aa 1-257) of Piwi was used as a bait to pull down Flag-tagged Esc fragments i to iii. Bound proteins were visualized by immunoblotting to flag.

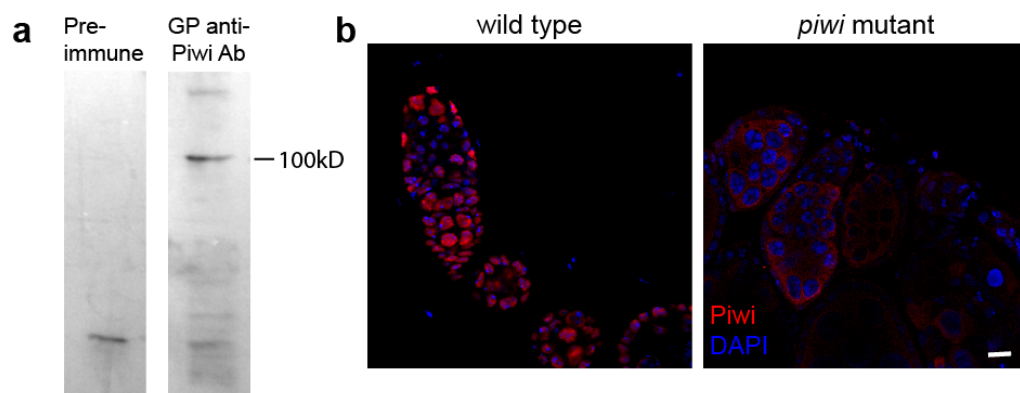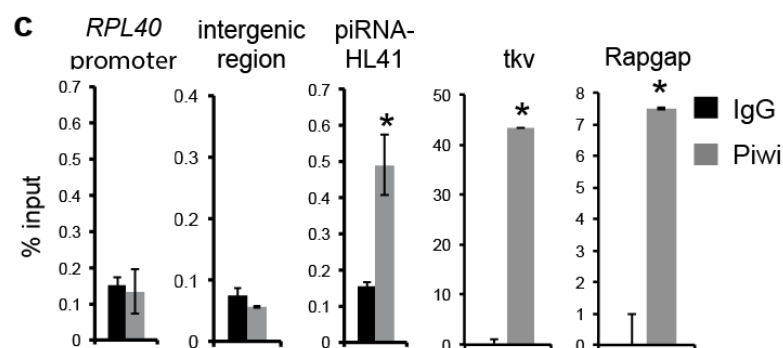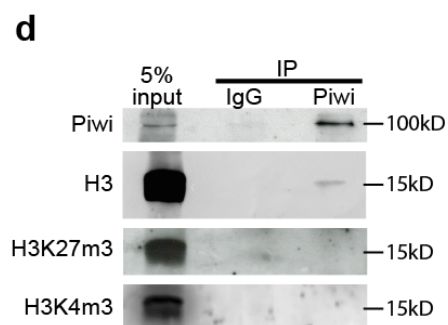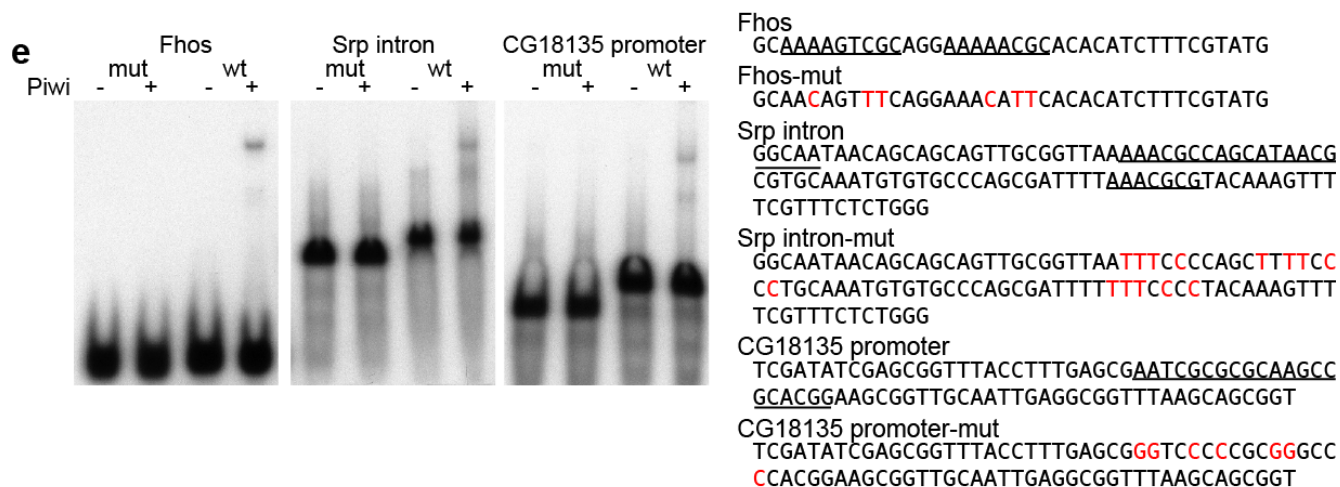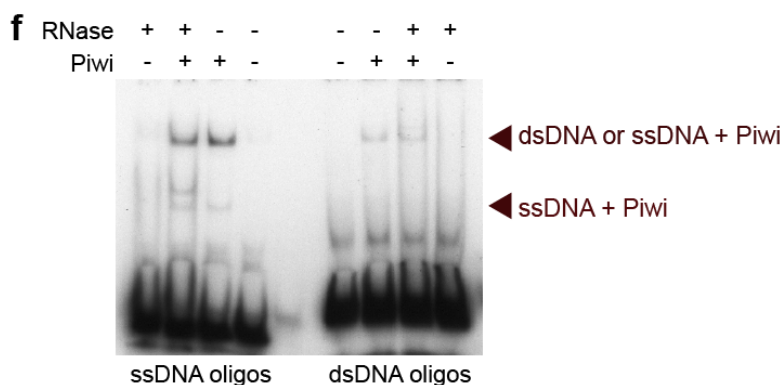

**Supplementary Fig. 4.** Specificity of the generated Piwi antibody, Piwi chromatin IP, and EMSA of Piwi recombinant protein on identified motif.

- (a) Immunoblotting analysis of wild type ovarian extracts using pre-immune sera and guinea pig (GP) anti-Piwi antibodies.
- (b) Piwi immunofluorescence microscopy of wild type and *piwi* mutant ovaries shows that Piwi signals are greatly reduced in the *piwi* mutant, with only a very low level of residual non-specific background visible.
- (c) ChIP-qPCR analyses of Piwi levels in wild type ovarian cells at Piwi binding sites inferred from ChIP-Seq data (*tkv*, *Rapgap*), control regions (intergenic, *RPL40* promoter) or previously reported targets (*piRNA-HL41*, Huang et al. 2013). Error bars represent standard deviations calculated from three qPCR biological replicates. Asterisks indicate statistically significant differences ( $p < 0.001$ ; Chi-square test).
- (d) Piwi chromatin immunoprecipitate from ovarian cells was analyzed by immunoblotting to Piwi, histone H3, H3K27m3 and H3K4m3.
- (e) EMSA analysis of recombinant Piwi protein binding to wild type and mutant motifs using *Fhos* locus, *Srp* intron, and *CG18135* promoter oligomers. For each oligomer, sequences, motif (underlined), and mutated sequence (text in red) are indicated.
- (f) EMSA analysis of recombinant Piwi protein binding to single-stranded (ss) vs. double-stranded (ds) *Fhos* locus DNA, with or without RNase A and H addition. Piwi prefers binding to ssDNA and is unaffected by RNase.

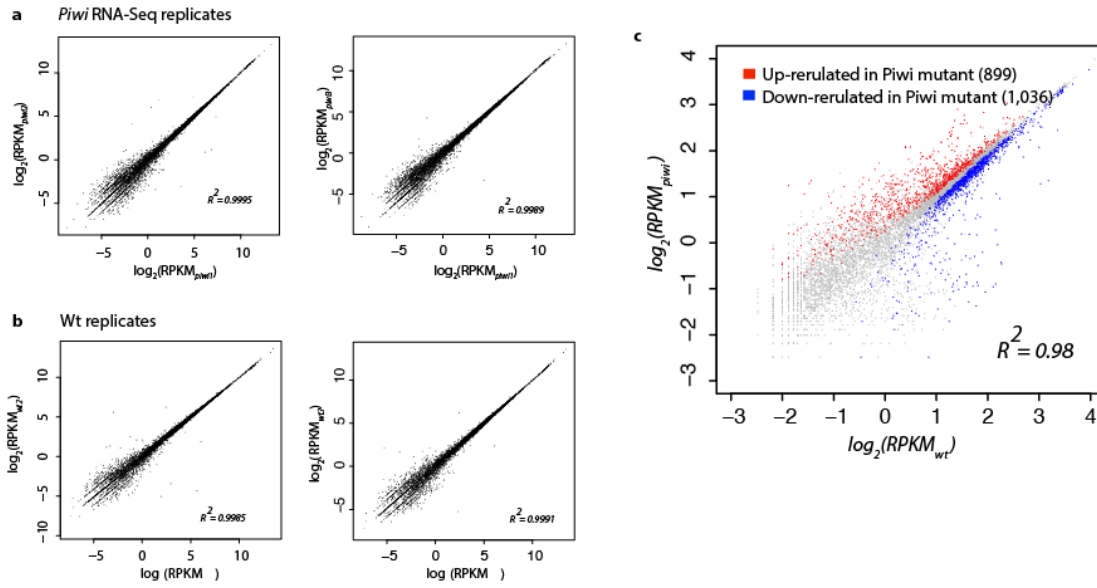

**Supplementary Fig. 5. RNA-Seq analysis.**

(a) Scatter plots for comparing RNA-Seq biological replicates from *piwi* mutant ovaries. High correlation was observed between the replicates.

(b) Scatter plots for comparing RNA-Seq biological replicates from wild type ovaries. Similarly high correlations were observed between biological replicates.

(c) Scatter plot for comparison of replicate-averaged RNA-Seq data between *piwi* mutant and wild type ovaries. Differentially expressed genes were determined using Student's *t*-test on replicates. Statistically significant differentially expressed genes (using p-value cutoff of 0.001) are shown in red (for up-regulated genes in *piwi* mutant) or blue (for down-regulated genes in *piwi* mutant). PANTHER analysis of enriched gene ontologies among differentially expressed genes is shown in Figure 4.

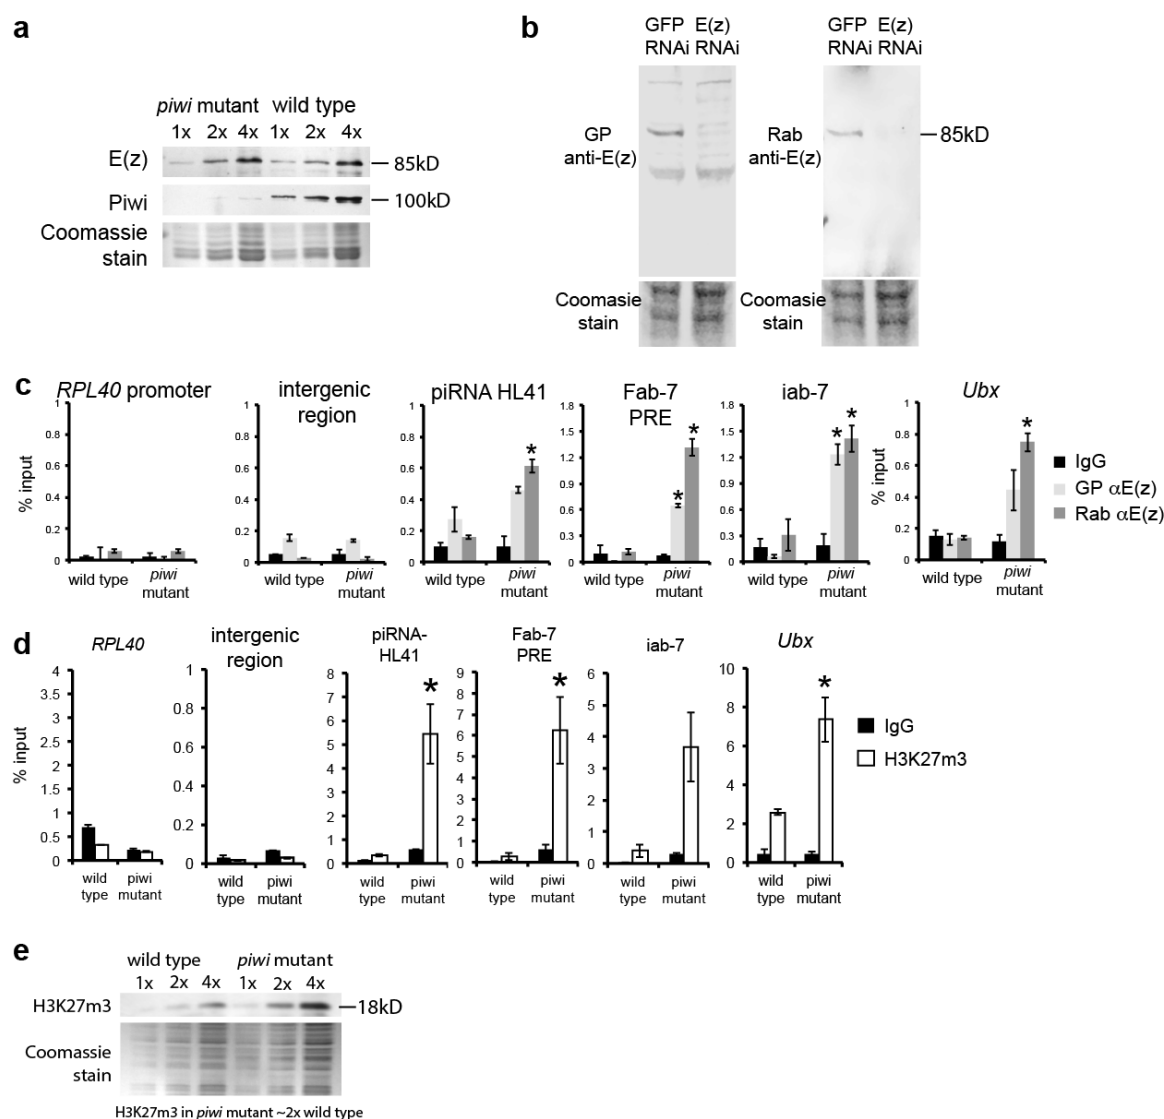

**Supplementary Fig. 6.** Protein levels of E(z) in wild type and *piwi* mutant ovaries, specificity of the generated E(z) antibodies, and qPCR analyses of E(z) and H3K27m3 ChIP.

(a) Two-fold serial dilutions of ovarian extracts from *piwi* mutant and wild type flies were analyzed by immunoblotting to E(z) and Piwi. Normalization of E(z) band signals to Coomassie staining signals showed that E(z) protein levels were at similar levels in wild type and *piwi* mutant.

(b) Specificity of guinea pig and rabbit anti-E(z) antibodies used for immunoblotting analysis of ovarian extracts from GFP RNAi and E(z) (C3L) RNAi flies. Bottom portions of the gel were Coomassie-stained to show equal loading.

(c) E(z) ChIP-qPCR analyses of wild type and *piwi* mutant ovarian cells using a newly generated guinea pig anti-E(z) antibody. Error bars represent standard deviations calculated from triplicate qPCR reactions. Asterisks indicate statistically significant differences ( $p < 0.001$ ; Chi-square test).

(d) H3K27m3 ChIP-qPCR analyses of wild type and *piwi* mutant ovarian cells. Error bars represent standard deviations calculated from triplicate qPCR reactions. Asterisks indicate statistically significant differences ( $p < 0.001$ ; Chi-square test).

(e) Two-fold serial dilutions of histone extracts from wild type and *piwi* mutant ovaries were analyzed by immunoblotting to H3K4m3 and H3.

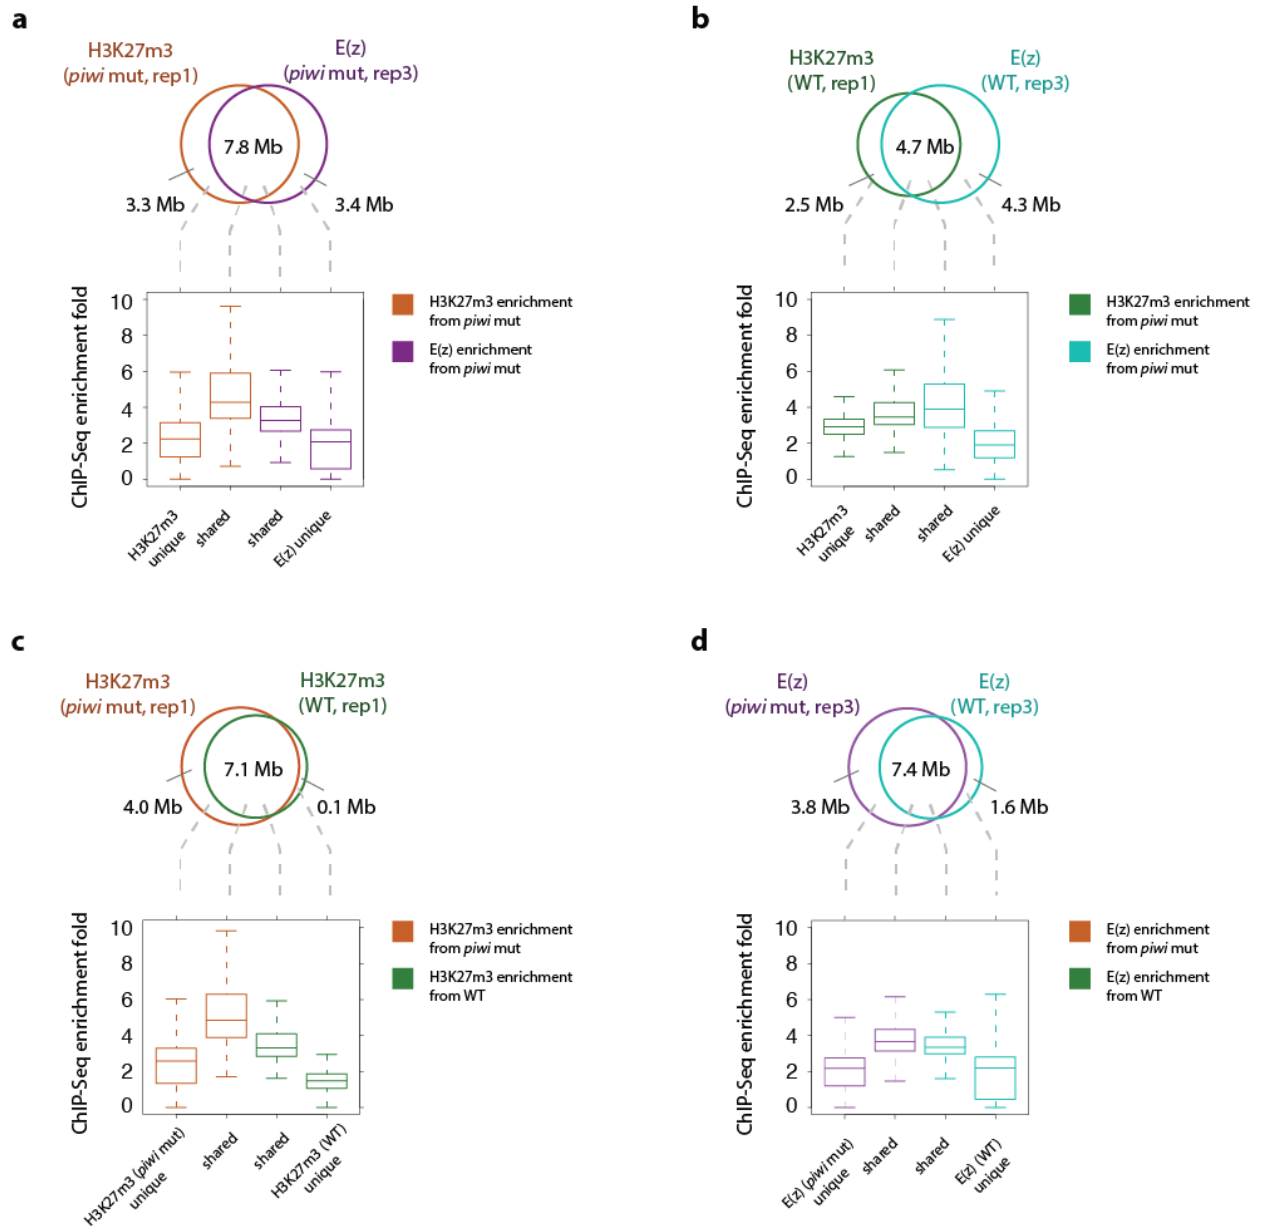

**Supplementary Fig. 7.** Detailed analysis of genomic regions identified by ChIP-Seq of H3K27m3 and E(z).

(a-d) Venn diagram displayed at the top of each panel shows the number of shared bases between the two datasets. For example, in panel A we analyzed ChIP-Seq signals within regions showing enrichment of H3K27m3 histone mark and E(z) enrichment in *piwi* mutant. Despite a significant overlap between the two datasets (7.8 Mb), a considerable number of bases is called as enriched for only H3K27m3 or E(z) in *piwi* mutant. To further investigate unique bases, we compared intensities for both H3K27m3 and E(z) for shared regions or unique regions. The lower panel shows a distribution boxplot for ChIP-Seq enrichment signals within shared and unique regions. Shared regions have on average higher enrichment compared to unique regions. This shows that unique regions are due to threshold selection where enrichment is very low but detectable in one dataset, and also low and not detectable at the same threshold in another dataset. Similar results are shown for other overlaps between H3K27m3 and E(z) enrichment regions between WT and *piwi* mutants. Therefore there is a strong evidence for nearly perfect co-localization patterns of E(z) and H3K27m3 in both *piwi* mutant and WT.

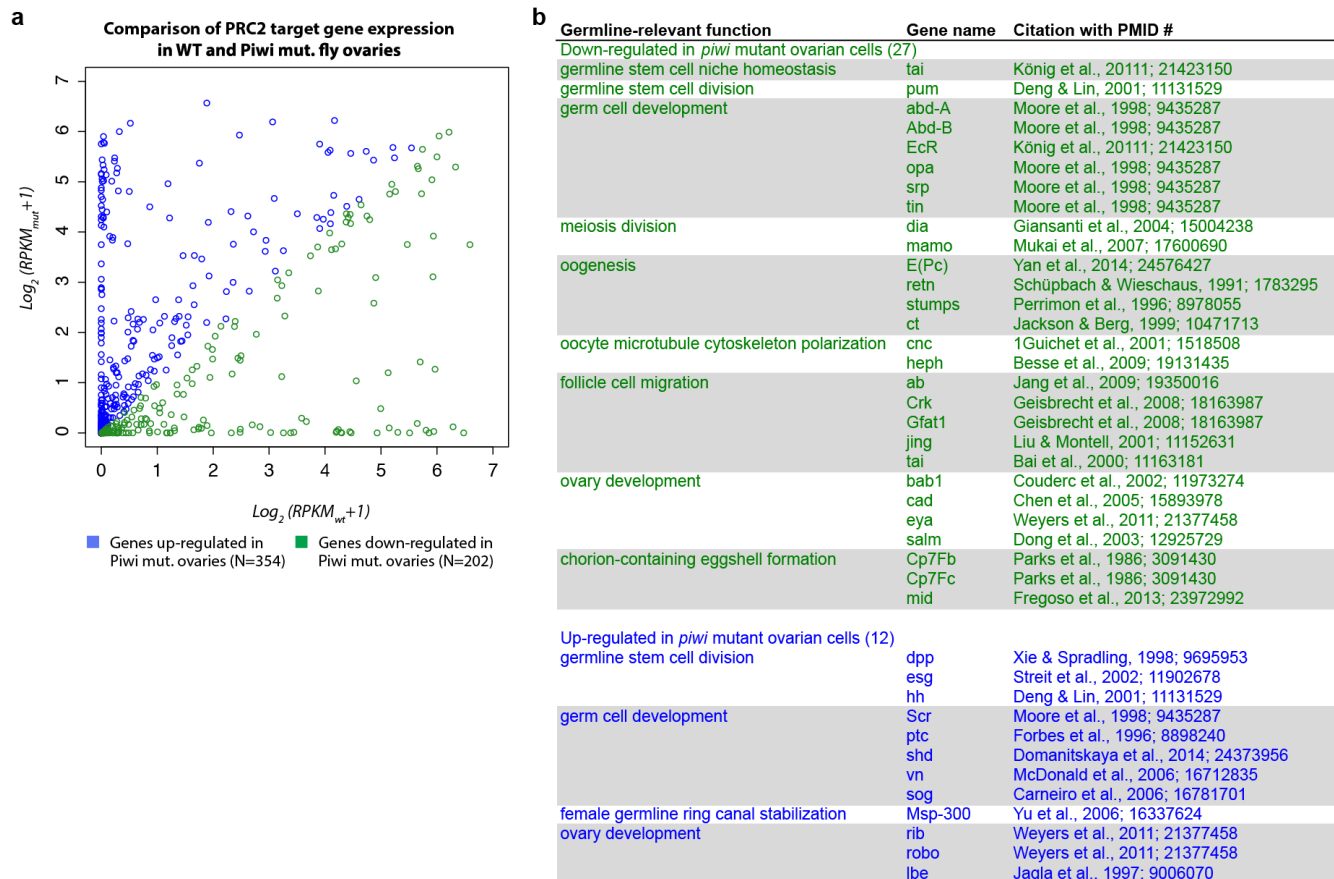

**Supplementary Fig. 8.** RNA-Seq analysis of PRC2-bound genes in wild-type and the *piwi* mutant ovarian cells.

(a) Scatter plot for comparison of replicate-averaged RNA-Seq data between *piwi* mutant and wild type ovaries. Differentially expressed PRC2-bound genes were determined using Student's *t*-test on replicates. Statistically significant differentially expressed genes (using p-value cutoff of 0.001) are shown in blue (for up-regulated genes in *piwi* mutant) or green (for down-regulated genes in *piwi* mutant).

(b) Table lists down- (green) or up- (blue) regulated PRC2-bound genes that exhibit functions related to germline formation, as well as the publications that reported the functions.

**A**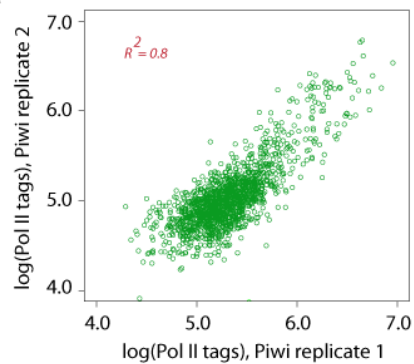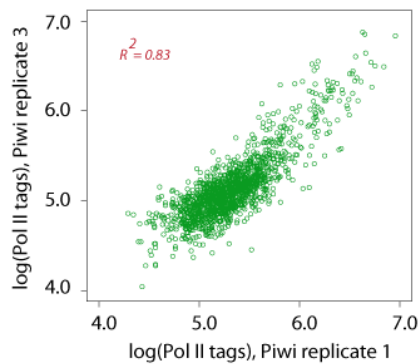**B**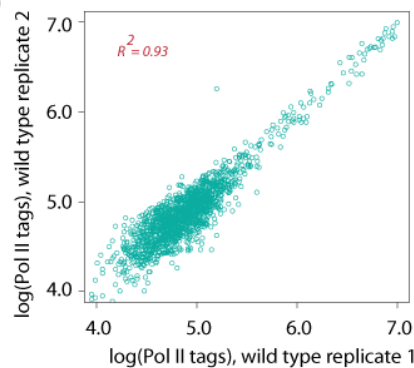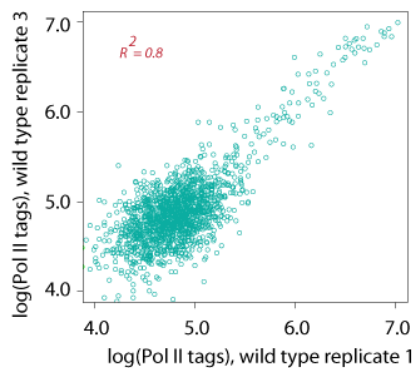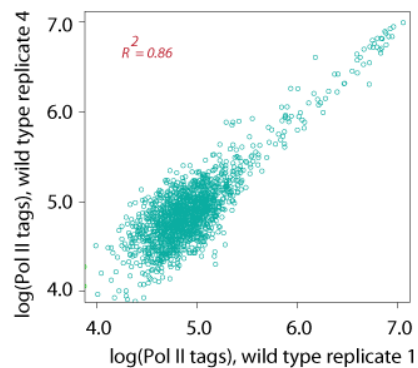**C**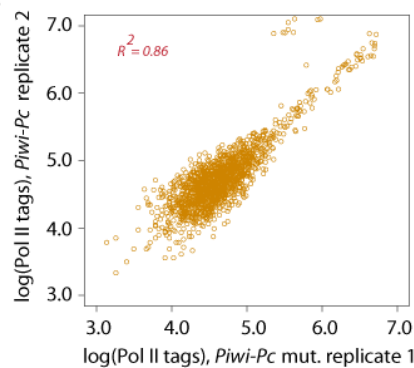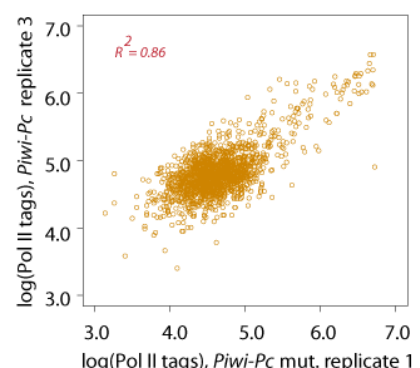**D**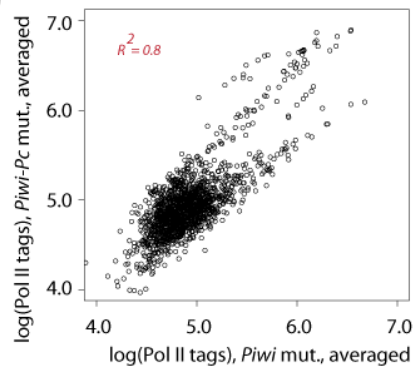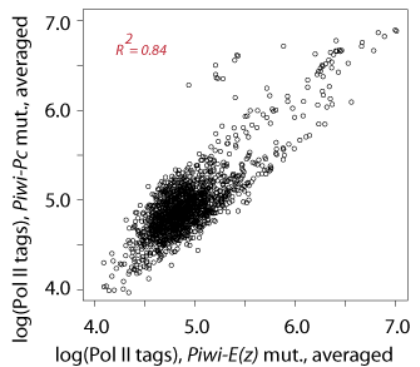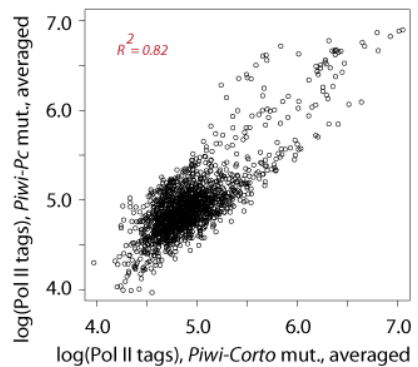

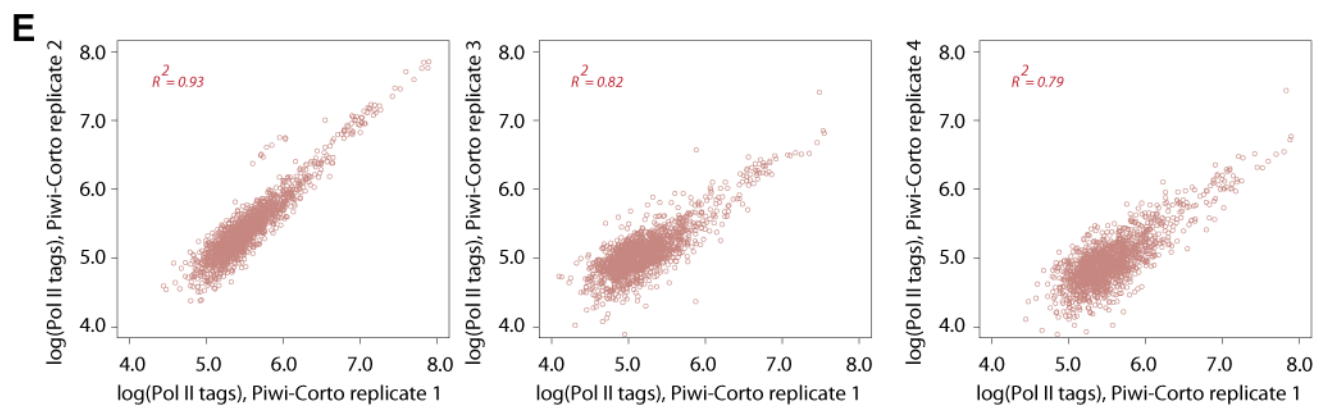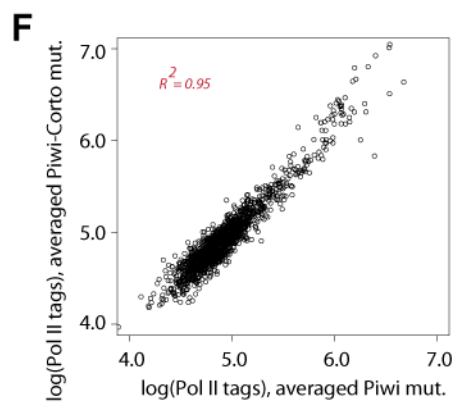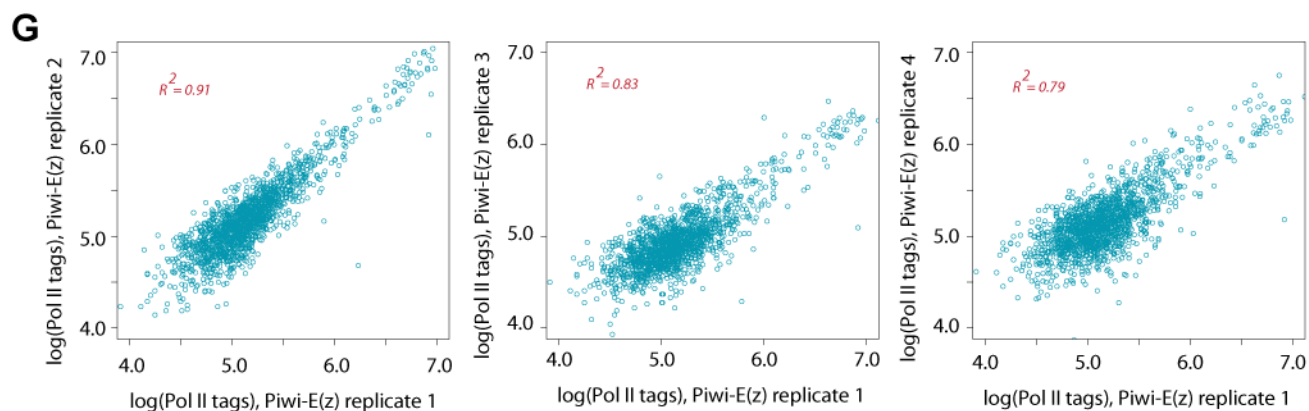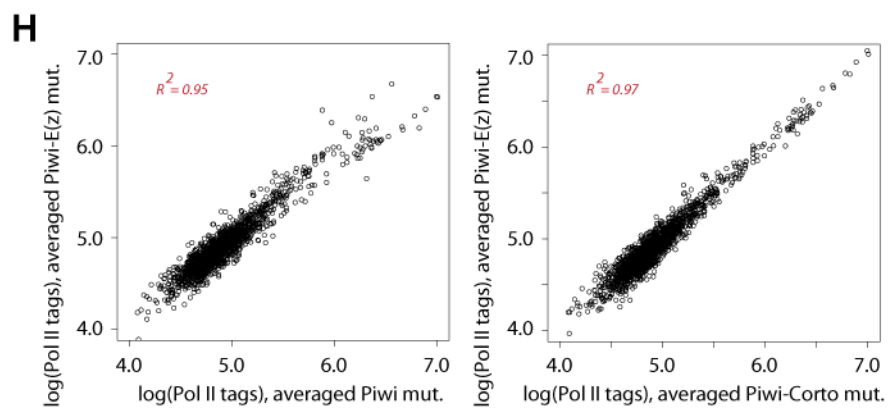

**Supplementary Fig. 9.** Analysis of replicate Illumina sequencing data of RNA PolII ChIP from wild type, *piwi*, , *piwi*; *Pc*/+, *piwi*; *corto*/+, and *piwi*; *E(z)*/+.

Comparative analyses of replicate ChIP-seq data and averaged data from replicates. R values indicate correlation between compared datasets.

- (a) Three *piwi* replicate data.
- (b) Four wild-type replicate data.
- (c) Three *piwi*; *Pc*/+ replicate data.
- (d) Averaged *piwi*; *Pc*/+ data compared to averaged *piwi*, *piwi*; *E(z)*/+ or *piwi*; *corto*/+ data.
- (e) Four *piwi*; *corto*/+ replicate data.
- (f) Averaged *piwi*; *corto*/+ data compared to *piwi* data.
- (g) Four *piwi*; *E(z)*/+ replicate data.
- (h) Averaged *piwi*; *E(z)*/+ data to averaged *piwi* or *piwi*; *corto*/+ data.

**Supplementary Table 1. Fly strains used in this study.**

| <b>Locus</b>   | <b>Molecular Function</b>                   | <b>Alleles/RNAi construct</b> | <b>Source</b>                       |
|----------------|---------------------------------------------|-------------------------------|-------------------------------------|
| <i>Corto</i>   | Enhancer of PcG of TrxG                     | 420                           | Frederique Peronnet                 |
| <i>Corto</i>   | Enhancer of PcG of TrxG                     | l1                            | Bloomington Stock Collection # 4788 |
| <i>E(z)</i>    | Enzymatic subunit of PRC2                   | 63                            | Richard Jones                       |
| <i>E(z)</i>    | Enzymatic subunit of PRC2                   | RNAi construct                | VDRC Transformant # 27646 (C3L)     |
| <i>Pc</i>      | Core subunit of PRC1                        | 1                             | Bloomington Stock Collection # 1728 |
| <i>Pc</i>      | Core subunit of PRC1                        | 3                             | Bloomington Stock Collection # 3399 |
| <i>Pc</i>      | Core subunit of PRC1                        | RNAi construct                | VDRC Transformant # 41320 (C3V)     |
| <i>awd</i>     | Microtubule and GTP binding                 | KRS6                          | Bloomington Stock Collection # 9035 |
| <i>kni</i>     | RNA PolII transcription factor              | 10                            | Bloomington Stock Collection # 3307 |
| <i>Piwi</i>    | RNA-binding; germline stem cell maintenance | RNAi construct                | VDRC Transformant # 22235 (C2L)     |
| <i>Esc</i>     | Core subunit of PRC2                        | RNAi construct                | VDRC Transformant # 5692 (C3L)      |
| <i>Esc</i>     | Core subunit of PRC2                        | RNAi construct                | VDRC Transformant # 5690 (C3V)      |
| <i>Tj:Gal4</i> | Tj promoter drives Gal4                     |                               | Bloomington Stock Collection # 3954 |

**Supplementary Table 2. Antibodies used in this study.**

| <b>Antibodies</b>                                      | <b>Source</b>                        | <b>Application(s)</b>                                                             |
|--------------------------------------------------------|--------------------------------------|-----------------------------------------------------------------------------------|
| Rabbit anti-H3K27m3                                    | Active Motif, 39155                  | IF 1:200; WB 1:10,000; ChIP 4ul per IP                                            |
| Rabbit anti-H3K4m3                                     | Active Motif, 39159                  | WB 1:10,000                                                                       |
| Guinea pig anti-Corto                                  | Our own lab                          | IP 6ul of antisera per IP; WB 1:25 of purified antibodies                         |
| Mouse anti-Piwi                                        | Haru Siomi                           | 4ul of purified antibodies per IP; WB 1:200 of supernatant; IF 1:3 of supernatant |
| Guinea pig anti-Piwi                                   | Lin lab/Peng lab                     | 6ul of antisera per IP                                                            |
| Mouse anti-Esc                                         | Developmental Studies Hybridoma Bank | WB 1:4 of supernatant                                                             |
| Rabbit anti-Pc                                         | Vincente Pirotta                     | WB 1:50                                                                           |
| Rabbit anti-E(z)                                       | Santa Cruz Biotechnology, sc-98265   | WB 1:100 IF 1:5                                                                   |
| Rabbit anti-Ezh2 also recognizes E(z),                 | Active Motif, 39901                  | IP 6ul                                                                            |
| Rabbit anti-cMyc                                       | Sigma-Aldrich, C3950-0.2mg           | WB 1:1,1000                                                                       |
| Rabbit anti-E(z)                                       | Peng lab                             | 4ul purified antisera per IP                                                      |
| Rabbit anti-FLAG                                       | Sigma-Aldrich, F7425-.2MG            | WB 1:1,1000                                                                       |
| Mouse 1B1 anti-Hts                                     | Developmental Studies Hybridoma Bank | IF 1:25 of concentrated supernatant                                               |
| Rabbit anti-Vasa                                       | Santa Cruz Biotechnology, sc-30210   | IF 1:200                                                                          |
| Guinea pig anti-Traffic jam (Tj)                       | Dorothea Godt                        | IF 1:4,000                                                                        |
| Mouse anti-Aub                                         | Haru Siomi                           | WB 1:3000                                                                         |
| Mouse anti-RNA Polymerase II                           | Covance, MMS-126R                    | 4ul per IP                                                                        |
| Mouse anti-RNA Polymerase II                           | Millipore, 05-623                    | 5ul per IP                                                                        |
| Mouse anti-RNA Polymerase II                           | Active Motif, 39097                  | 10ul per IP                                                                       |
| Cy3-conjugated goat anti-rabbit                        | Jackson ImmunoResearch Laboratories  | IF 1:200                                                                          |
| Cy3-conjugated goat anti-mouse                         | Jackson ImmunoResearch Laboratories  | IF 1:200                                                                          |
| Alexa488-conjugated goat anti-rabbit from              | Invitrogen                           | IF 1:400                                                                          |
| Alexa555-conjugated goat anti-guinea pig               | Invitrogen                           | IF 1:400                                                                          |
| HRP-conjugated mouse anti-rabbit, light chain specific | Jackson ImmunoResearch Laboratories  | WB 1:40,000                                                                       |
| HRP-conjugated goat anti-rabbit                        | Jackson ImmunoResearch Laboratories  | WB 1:20,000                                                                       |
| HRP-conjugated goat anti-mouse                         | Jackson ImmunoResearch Laboratories  | WB 1:20,000                                                                       |
| HRP-conjugated goat anti-guinea pig                    | Jackson ImmunoResearch Laboratories  | WB 1:20,000                                                                       |

**Supplementary Table 3. DNA Primers used for RT-qPCR.**

|             |                            |             |                            |
|-------------|----------------------------|-------------|----------------------------|
| 412-F       | CACCGGTTTGGTCGAAAAG        | 412-R       | GGACATGCCTGGTATTTTGG       |
| Accord-F    | ACAATCCACCAACAGCAACA       | Accord-R    | AAAAGCCAAAATGTCGGTTG       |
| Accord2-F   | TTGCTTTCGGACTTCGTCTT       | Accord2-R   | TTCCACAACGAAAACAACCA       |
| Blood-F     | TGCCACAGTACCTGATTTGCG      | Blood-R     | GATTGCGCTTTTACGTTTGC       |
| Diver-F     | GGCACCACATAGACACATCG       | Diver-R     | GTGGTTTGCATAGCCAGGAT       |
| Diver2-F    | CTTCAGCCAGCAAGGAAAAC       | Diver2-R    | CTGGCAGTCGGGTGTAATTT       |
| gtwin-F     | TTCGCACAAGCGATGATAAG       | gtwin-R     | GATTGTTGTACGGCGACCTT       |
| gypsy-F     | GTTTCATACCCTTGGTAGTAGC     | gypsy-R     | CAACTTACGCATATGTGAGT       |
| gypsy6-F    | GACAAGGGCATAACCGATACTGTGGA | gypsy6-R    | AATGATTCTGTTCCGGACTTCCGTCT |
| HeT-A-F     | CGCGCGGAACCCATCTTCAGA      | HeT-A-R     | CGCCGCAGTCGTTTGGTGAGT      |
| Hopper-F    | GGCTGGCTTCAACAAAAGAA       | Hopper-R    | GGACTCCCGAAAACGTCATA       |
| I-element-F | GACCAAATAAAAAATAATACGACTTC | I-element-R | AACTAATTGCTGGCTTGTTATG     |
| Invader1-F  | GTACCGTTTTTGGAGCCCGTA      | Invader1-R  | AACTACGTTGCCATTCTGG        |
| Max-F       | TCTAGCCAGTCGAGGCGTAT       | Max-R       | TGGAAGAGTGTCGCTTTGTG       |
| mdg1-F      | AACAGAAACGCCAGCAACAGC      | mdg1-R      | CGTTCCCATGTCCGTTGTGAT      |
| R1A1-F      | AATTCCCGAGCTGTGCTAGA       | R1A1-R      | GTCTCAAGGCACCTTTCAGC       |
| rp49-F      | CCGCTTCAAGGGACAGTATCTG     | rp49-R      | ATCTCGCCGCAGTAAACGC        |
| Rt1a-F      | CCACACAGACTGAGGCAGAA       | Rt1a-R      | ACGCATAACTTTCCGGTTTG       |
| ZAM-F       | ACTTGACCTGGATACACTCACAAC   | ZAM-R       | GAGTATTACGGCGACTAGGGATAC   |

**Supplementary Table 4. Primers used to make constructs.**

|                        |                                            |                        |                                             |
|------------------------|--------------------------------------------|------------------------|---------------------------------------------|
| Fsel-piwi-for          | aaaaaGGCCGGCC<br>ATGgctgatgatcagggacg      | KpnI-piwi-rev          | aaaaa GGTACC<br>ttatagataataaaaacttctttcgag |
| Fsel-corto-for         | aaaaaGGCCGGCC<br>ATGACGATGGCCGCCTGTTA      | KpnI-corto-rev         | aaaaa GGTACC<br>TCACACGTTGTAGCAGGA          |
| Fsel-E(z)-for          | aaaaaGGCCGGCC<br>ATGAATAGCACTAAAGTGCCG     | KpnI-E(z)-rev          | aaaaa GGTACC tcaaacaatttcatttcacgc          |
| Fsel-Su(z)12-for       | aaaaaGGCCGGCC<br>ATGGCCCCAGCGAAAAACG       | KpnI-Su(z)12-rev       | aaaaa GGTACC ttagttgccacacagttg             |
| Fsel-Esc-for           | aaaaaGGCCGGCC<br>ATGAGCAGTGATAAAGTGAAAAACG | KpnI-Esc-rev           | aaaaa GGTACC tcagatggaagttgttgc             |
| KpnI-Piwi-nt771rev     | aaaaa GGTACC ttgtgagttattcggtgcc           | Fsel-Su(z)12-nt1978For | aaaaaGGCCGGCC cagcggcagcgcgagg              |
| Fsel-Su(z)12-nt1438For | aaaaaGGCCGGCCacctgcggccccgtgc              | KpnI-Su(z)12-nt2040Rev | aaaaaGGTACC ttctgtcttctgtgcatgc             |
| Fsel-Su(z)12-nt640For  | aaaaaGGCCGGCCcgcccaatgggtgagcag            | KpnI-Su(z)12-nt1500Rev | aaaaaGGTACC cgtccaggcaggtcttc               |
| KpnI-Su(z)12-nt642rev  | aaaaaGGTACCctctccagacgatgcgc               | Fsel-Piwi-nt328For     | aaaaaGGCCGGCC ccggaatggcggatcg              |
| Fsel-Piwi-nt769For     | aaaaaGGCCGGCC<br>aaagtattgcgcaccgagac      | Fsel-Esc-nt868For      | aaaaaGGCCGGCC gactgtgtgcagtggttc            |
| KpnI-Esc-nt729Rev      | aaaaa GGTACCccacagcttcagcagtg              | Fsel-Esc-nt727For      | aaaaaGGCCGGCC tgggtctgaatacgcgc             |
| KpnI-Su(z)12-nt658Rev  | aaaaaGGTACC cattgggcgcacgtctg              | KpnI-Su(z)12-nt690Rev  | aaaaaGGTACC ctgatgcgaaatagcagct             |
| KpnI-Su(z)12-nt1170Rev | aaaaaGGTACC ctgaatgtgctccggtgt             | Fsel-Su(z)12-nt1138For | aaaaaGGCCGGCC<br>acggtgtgcaagaccaca         |
| Fsel-Piwi-nt508For     | aaaaaGGCCGGCC<br>tcgaagctggacattgaataca    | KpnI-Esc-nt252Rev      | aaaaaGGTACC cagcgtgtgaaggctac               |
| KpnI-Esc-nt450Rev      | aaaaaGGTACC tccgcggtatccagca               | Fsel-Esc-nt448For      | aaaaaGGCCGGCC<br>ggagtcacccgggtattgat       |
| Fsel-Piwi-nt448For     | aaaaaGGCCGGCC<br>ggactgcaactgttcacc        | Fsel-Piwi-nt478For     | aaaaaGGCCGGCC<br>gagcaggaaatcacggtg         |
| KpnI-Piwi-nt771rev     | aaaaa GGTACC ttgtgagttattcggtgcc           | Fsel-Esc-nt250For      | aaaaaGGCCGGCC<br>ctgctgggcaaggatgag         |
| KpnI-Esc-nt600Rev      | aaaaaGGTACCgatgttccacaatcttatcgctg         | Fsel-Esc-nt598For      | aaaaaGGCCGGCC atccagagccatgtgtgc            |
| KpnI-Esc-883Rev        | aaaaaGGTACC accactgcacacagtcca             | Fsel-Esc-nt870For      | aaaaaGGCCGGCCctgtgtgcagtggttcg              |

**Supplementary Table 5. Primers used for ChIP-qPCR.**

|               |                          |               |                      |
|---------------|--------------------------|---------------|----------------------|
| RPL40-prom-F  | cgaaaaatcgcaataacgtg     | RPL40-prom-R  | ttcgacagaaacagctccac |
| piRNA-41-F    | &c* * c* &c* &ac* &ac* c | piRNA-41-R    | cgaaggtagcgggtgaagtt |
| Fab-7-F       | ggcagtggggaagtcgtattt    | Fab-7-R       | caaagcttctggggctttac |
| iab-7-F       | tttgggcctctagttttcg      | iab-7-R       | cctacgacagtgcggtattc |
| hh-prom-F     | tggctcttttccagacctt      | hh-prom-R     | atttctgggcacacattga  |
| Intergenic-F  | gaaccaggacttttcgag       | Intergenic-R  | ccactttgcaacatctttcc |
| Ubx-Piwiseg-F | ttcgcatagagccactcatc     | Ubx-Piwiseg-R | ttttattggcccgttttc   |
| gypsy-F       | cgccacaaggctagtataa      | gypsy-R       | ttccttcttcgctgaggtt  |
| ZAM-F         | agtgaagcagcaaacactt      | ZAM-R         | agttacctcggggagtctt  |

**Supplementary Table 6. DNA oligomers used for EMSA.**

|                            |                                                                                                           |                                    |                                                                                                        |
|----------------------------|-----------------------------------------------------------------------------------------------------------|------------------------------------|--------------------------------------------------------------------------------------------------------|
| <i>Fhos</i>                | gcaaaagtcgcaggaaaaacgcacacatctt<br>tcgtatg                                                                | mutant- <i>Fhos</i>                | gcaacagtttcaggaaacattcacacatctt<br>cgtatg                                                              |
| <i>Srp</i>                 | gcaataacagcagcagttgcggttaaaaacg<br>ccagcataacgcgtgcaaagtgtgtcccagc<br>gattttaaacgcgtacaaagtttcgtttctctggg | mutant- <i>Srp</i>                 | gcaataacagcagcagttgcggttaatttcc<br>ccagctttcccctgcaaagtgtgtcccagcg<br>atttttcccctacaaagtttcgtttctctggg |
| <i>CG18135</i><br>promoter | tcgatatcgagcgggttaccttgagcgaatcgc<br>gcgcaagccgcacggaagcgggtgcaattga<br>ggcgggttaagcagcgggt               | mutant- <i>CG18135</i><br>promoter | tcgatatcgagcgggttaccttgagcgggtc<br>ccccgcggggccccacggaagcgggtgcaa<br>ttgaggcgggttaagcagcgggt           |
